# Supplementary material for: The Impact of Harsh Stratospheric Conditions on Survival and Antibiotic Resistance Profile of Non-Spore Forming Multidrug Resistant Human Pathogenic Bacteria Causing Hospital-Associated Infections
Source: MDPI journal article supplement (doi:10.3390/ijerph20042787), 2023-02-04
Supplement: s1 [file s1]

## Supplementary Materials

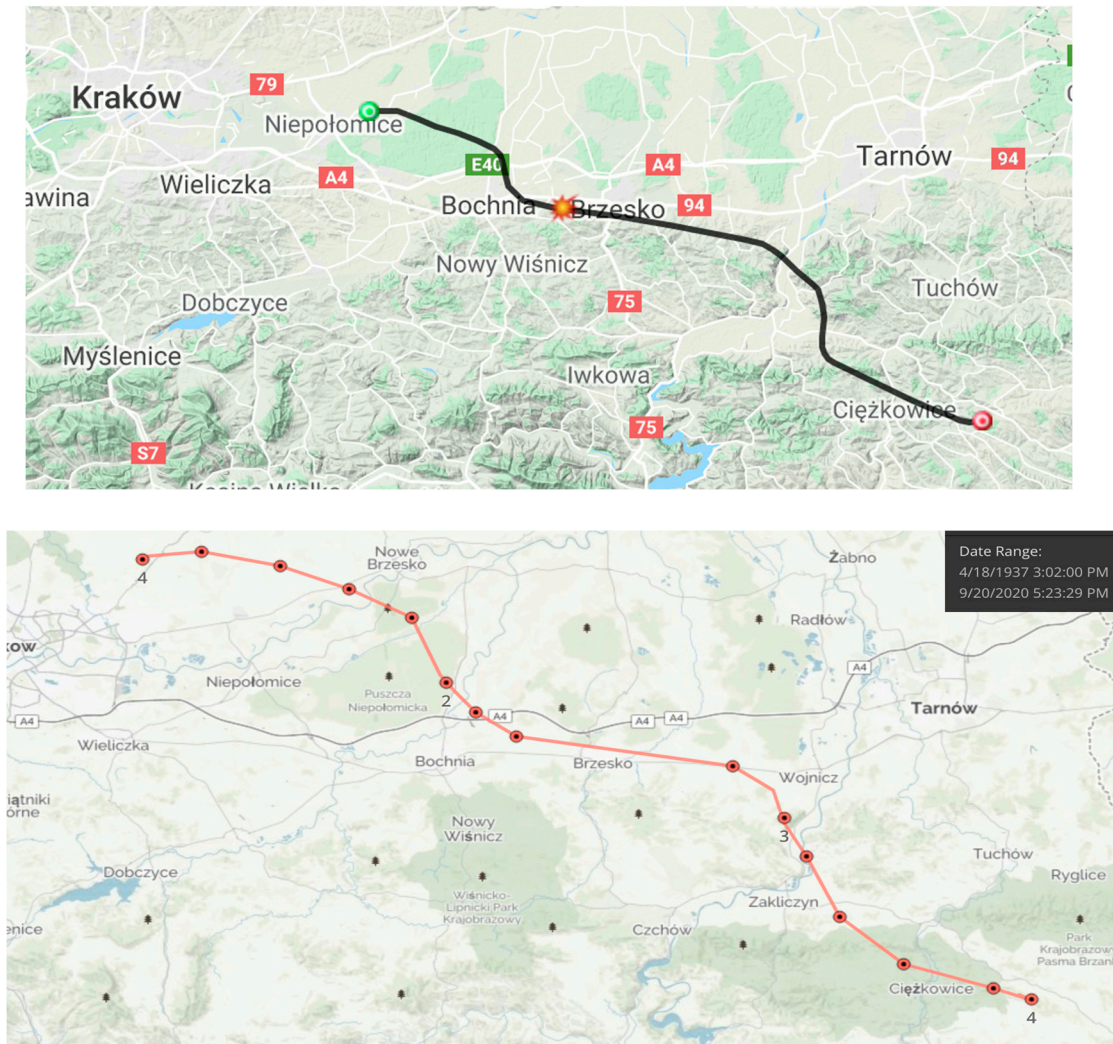

**Figure S1.** Maps revealing the flight prediction (top) and the flight tracking using SPOT GEN3 satellite tracking system during the STRATOS mission on 18th July 2020 (bottom).

**Table S1.** List of tested antibiotics used for each species of bacteria (according to EUCAST recommendations).

|                                       | <i>E. coli</i> | <i>K. pneumoniae</i> | <i>P. aeruginosa</i> | <i>E. faecium</i> | <i>S. aureus</i> |
|---------------------------------------|----------------|----------------------|----------------------|-------------------|------------------|
| <b>Diffusion Discs</b>                |                |                      |                      |                   |                  |
| Amikacin 30 µg                        | +              | +                    | +                    |                   | +                |
| Amoxicillin/ clavulanic acid 20/10 µg | +              | +                    |                      |                   |                  |
| Ampicillin 10 µg                      |                |                      |                      | +                 |                  |
| Cefepime 30 µg                        | +              | +                    | +                    |                   |                  |
| Cefotaxime 30 µg                      | +              | +                    |                      |                   |                  |
| Cefoxitin 30 µg                       |                |                      |                      |                   | +                |
| Ceftazidime 30 µg                     | +              | +                    | +                    |                   |                  |
| Ciprofloxacin 5 µg                    | +              | +                    | +                    | +                 | +                |
| Clindamycin 2 µg                      |                |                      |                      |                   | +                |
| Ertapenem 10 µg                       | +              | +                    |                      |                   |                  |
| Erythromycin 15 µg                    |                |                      |                      |                   | +                |
| Gentamicin 10 µg                      | +              | +                    |                      |                   | +                |
| Gentamicin 30 µg                      |                |                      |                      | +                 |                  |
| Imipenem 10 µg                        | +              | +                    | +                    | +                 |                  |
| Levofloxacin 5 µg                     | +              | +                    | +                    | +                 | +                |
| Lincomycin 15 µg                      |                |                      |                      |                   | +                |
| Linezolid 30 µg                       |                |                      |                      |                   | +                |

|                                   |   |   |   |   |
|-----------------------------------|---|---|---|---|
| Meropenem 10 µg                   | + | + | + |   |
| Mupirocin 200 µg                  |   |   |   | + |
| Penicillin 30 µg                  |   |   |   | + |
| Piperacillin 100 µg               | + | + | + |   |
| Piperacillin/Tazobactam 100/10 µg | + | + | + |   |
| Streptomycin 300 µg               |   |   |   | + |
| Ticarcillin 75 µg                 |   |   | + |   |
| Ticarcillin/clavulanic acid 85 µg |   |   | + |   |
| Tigecycline 15 µg                 | + |   |   | + |
| <b>E-tests</b>                    |   |   |   |   |
| Ceftaroline range 0.002-32 µg/ml  |   |   |   | + |
| Daptomycin range 0.016-256 µg/ml  |   |   |   | + |
| Linezolid range 0.016-256 µg/ml   |   |   | + | + |
| Teicoplanin range 0.016-256 µg/ml |   |   | + | + |
| Tigecycline range 0.016-256 µg/ml | + | + | + | + |
| Vancomycin range 0.016-256 µg/ml  |   |   | + | + |

Table S2. Details of the PCR analyses.

| Gene         | Primers' sequence 5' → 3'                             | Molecular size (bp) | Reaction protocol                                 | Reference |
|--------------|-------------------------------------------------------|---------------------|---------------------------------------------------|-----------|
| <i>kpc</i>   | F: CGTCTAGTTCTGCTGTCTTG<br>R: CTTGTCATCCTTGTTAGGCG    | 798                 | T1: 5 min, 95°C; T2: 30 s, 95°C; T3: 40 s, 52°C;  | 45        |
|              |                                                       |                     | T4: 50 s, 72°C; T5: 7 min, 72°C                   |           |
|              |                                                       |                     | T2-4 repeated 35 times                            |           |
| <i>ndm-1</i> | F: GGTTTGGCGATCTGGTTTTTC<br>R: CGGAATGGCTCATCACGATC   | 621                 | T1: 5 min, 95°C; T2: 30 s, 95°C; T3: 40 s, 52°C;  | 46        |
|              |                                                       |                     | T4: 50 s, 72°C; T5: 7 min, 72°C                   |           |
|              |                                                       |                     | T2-4 repeated 30 times                            |           |
| <i>vim</i>   | F: GATGGTGTTGGTCGCATA<br>R: CGAATGCGCAGCACCAG         | 390                 | T1: 5 min, 95°C; T2: 30 s, 95°C; T3: 30 s, 52°C;  | 46        |
|              |                                                       |                     | T4: 50 s, 72°C; T5: 7 min, 72°C                   |           |
|              |                                                       |                     | T2-4 repeated 30 times                            |           |
| <i>vanB</i>  | B1: ATGGGAAGCCGATAGTC<br>B2: GATTTCGTTCTCGACC         | 635                 | T1: 5 min, 95°C; T2: 30 s, 95°C; T3: 45 s, 54°C;  | 47        |
|              |                                                       |                     | T4: 1 min, 72°C; T5: 7 min, 72°C                  |           |
|              |                                                       |                     | T2-4 repeated 30 times                            |           |
| <i>mecA</i>  | F: CATTGATCGCAACGTTCAATTT<br>R: TGGTCTTTCTGCATTCCTGGA | 99                  | T1: 55 min, 95°C; T2: 30 s, 95°C; T3: 30 s, 60°C; | 48        |
|              |                                                       |                     | T4: 30 s, 72°C; T5: 10 min, 72°C                  |           |
|              |                                                       |                     | T2-4 repeated 35 times                            |           |

**Table S3.** Results of the antibiotic resistance of the initial strains (before the stratospheric balloon flight).

**a)**

| Antibiotic | <i>E. coli</i> |                       | <i>E. coli</i> (resistant) |                       |
|------------|----------------|-----------------------|----------------------------|-----------------------|
|            | Diameter (mm)  | EUCAST Interpretation | Diameter (mm)              | EUCAST Interpretation |
| AK         | 22             | Susceptible           | 16                         | Resistant             |
| AMC        | 23             | Susceptible           | 6                          | Resistant             |
| CAZ        | 30             | Susceptible           | 6                          | Resistant             |
| CIP        | 34             | Susceptible           | 6                          | Resistant             |
| CN         | 20             | Susceptible           | 19                         | Susceptible           |
| CTX        | 32             | Susceptible           | 6                          | Resistant             |
| ETP        | 34             | Susceptible           | 6                          | Resistant             |
| FEP        | 32             | Susceptible           | 6                          | Resistant             |
| IMP        | 30             | Susceptible           | 8                          | Resistant             |
| LEV        | 32             | Susceptible           | 6                          | Resistant             |
| MEM        | 31             | Susceptible           | 6                          | Resistant             |
| PRL        | 28             | Susceptible           | 6                          | Resistant             |
| TGC        | 25             | Susceptible           | 24                         | Susceptible           |
| TZP        | 28             | Susceptible           | 6                          | Resistant             |
| E-TEST     | MIC (mg/L)     | EUCAST Interpretation | MIC (mg/L)                 | EUCAST Interpretation |
| TGC        | 0.094          | Susceptible           | 0,019                      | Susceptible           |

Legend: Diffusion Discs: AK – Amikacin; AMC - Amoxicillin/clavulanic acid; CAZ – Ceftazidime; CIP – Ciprofloxacin; CN – Gentamicin; CTX – Cefotaxime; ETP – Ertapenem; FEP – Cefepime; IMP – Imipenem; LEV – Levofloxacin; MEM – Meropenem; PRL – Piperacillin; TGC – Tigecycline; TZP - Piperacillin/Tazobactam; E-tests: TGC – Tigecycline

b)

| Antibiotic | <i>K. pneumoniae</i> |                       | <i>K. pneumoniae</i> (resistant) |                       |
|------------|----------------------|-----------------------|----------------------------------|-----------------------|
|            | Diameter (mm)        | EUCAST Interpretation | Diameter (mm)                    | EUCAST Interpretation |
| AK         | 23                   | Susceptible           | 13                               | Resistant             |
| AMC        | 17                   | Resistant             | 7                                | Resistant             |
| CAZ        | 15                   | Resistant             | 6                                | Resistant             |
| CIP        | 25                   | Susceptible           | 6                                | Resistant             |
| CN         | 8                    | Resistant             | 19                               | Susceptible           |
| CTX        | 20                   | Susceptible           | 6                                | Resistant             |
| ETP        | 29                   | Susceptible           | 9                                | Resistant             |
| FEP        | 25                   | Intermediate          | 6                                | Resistant             |
| IMP        | 28                   | Susceptible           | 10                               | Resistant             |
| LEV        | 21                   | Intermediate          | 8                                | Resistant             |
| MEM        | 29                   | Susceptible           | 11                               | Resistant             |
| PRL        | 10                   | Resistant             | 6                                | Resistant             |
| TZP        | 22                   | Susceptible           | 7                                | Resistant             |
| E-TEST     | MIC (mg/L)           | EUCAST Interpretation | MIC (mg/L)                       | EUCAST Interpretation |
| TGC*       | 3                    | Susceptible           | 1.5                              | Susceptible           |

Legend: Diffusion Discs: AK – Amikacin; AMC - Amoxicillin/ clavulanic acid; CAZ – Ceftazidime; CIP – Ciprofloxacin; CN – Gentamicin; CTX – Cefotaxime; ETP – Ertapenem; FEP – Cefepime; IMP – Imipenem; LEV – Levofloxacin; MEM – Meropenem; PRL – Piperacillin; TZP - Piperacillin/Tazobactam; E-tests: TGC – Tigecycline; \* - according to EUCAST, epidemiological cut off (ECOFF) for tigecycline for *K. pneumoniae* ≥4 mg/L

c)

| Antibiotic | <i>P. aeruginosa</i> |                          | <i>P. aeruginosa</i> (resistant) |                          |
|------------|----------------------|--------------------------|----------------------------------|--------------------------|
|            | Diameter<br>(mm)     | EUCAST<br>Interpretation | Diameter<br>(mm)                 | EUCAST<br>Interpretation |
| AK         | 22                   | Susceptible              | 6                                | Resistant                |
| CAZ        | 21                   | Intermediate             | 6                                | Resistant                |
| CIP        | 29                   | Intermediate             | 6                                | Resistant                |
| FEP        | 23                   | Intermediate             | 6                                | Resistant                |
| IMP        | 22                   | Intermediate             | 6                                | Resistant                |
| LEV        | 22                   | Intermediate             | 6                                | Resistant                |
| MEM        | 27                   | Susceptible              | 6                                | Resistant                |
| PRL        | 29                   | Intermediate             | 6                                | Resistant                |
| TIC        | 22                   | Intermediate             | 6                                | Resistant                |
| TTC        | 20                   | Intermediate             | 6                                | Resistant                |
| TZP        | 29                   | Intermediate             | 6                                | Resistant                |

Legend: Diffusion Discs: AK – Amikacin; CAZ – Ceftazidime; CIP – Ciprofloxacin; FEP – Cefepime; IMP – Imipenem; LEV – Levofloxacin; MEM – Meropenem; PRL – Piperacillin; TIC – Ticarcillin; TTC – Ticarcillin/clavulanic acid; TZP - Piperacillin/Tazobactam

d)

| Antibiotic | <i>E. faecalis</i> |                       | <i>E. faecalis</i> (resistant) |                       |
|------------|--------------------|-----------------------|--------------------------------|-----------------------|
|            | Diameter (mm)      | EUCAST Interpretation | Diameter (mm)                  | EUCAST Interpretation |
| AMP        | 24                 | Susceptible           | 29                             | Susceptible           |
| CIP        | 21                 | Susceptible           | 24                             | Susceptible           |
| CN 30      | 21                 | HLGR (-)              | 6                              | HLGR (+)              |
| IMP        | 27                 | Intermediate          | 30                             | Intermediate          |
| LEV        | 20                 | Susceptible           | 22                             | Susceptible           |
| S 300      | 19                 | HLSR (-)              | 17                             | HLSR (-)              |
| E-TEST     | MIC (mg/L)         | EUCAST Interpretation | MIC (mg/L)                     | EUCAST Interpretation |
| LZ         | 1.5                | Susceptible           | 1.5                            | Susceptible           |
| TGC        | 0.094              | Susceptible           | 0.094                          | Susceptible           |
| TP         | 0.19               | Susceptible           | 0.75                           | Susceptible           |
| VA         | 4.0                | Susceptible           | 48                             | Resistant             |

Legend: Diffusion Discs: AMP – Ampicillin; CIP – Ciprofloxacin; CN – Gentamicin; IMP – Imipenem; LEV – Levofloxacin; S – Streptomycin; E-tests: LZ – Linezolid; TGC – Tigecycline; TP – Teicoplanin; VA – Vancomycin



e)

| Antibiotic | <i>S. aureus</i> |                       | <i>S. aureus</i> (MRSA/VSSA) |                       | <i>S. aureus</i> (MRSA/VISA) |                       |
|------------|------------------|-----------------------|------------------------------|-----------------------|------------------------------|-----------------------|
|            | Diameter (mm)    | EUCAST Interpretation | Diameter (mm)                | EUCAST Interpretation | Diameter (mm)                | EUCAST Interpretation |
| AK         | 21               | Susceptible           | 14                           | Resistant             | 14                           | Resistant             |
| CIP        | 29               | Intermediate          | 24                           | Intermediate          | 6                            | Resistant             |
| CN         | 22               | Susceptible           | 24                           | Susceptible           | 6                            | Resistant             |
| DA         | 32               | Susceptible           | 28                           | Susceptible           | 6                            | Resistant             |
| E          | 20               | Susceptible           | 6                            | Resistant             | 6                            | Resistant             |
| FOX        | 30               | Susceptible           | 9                            | Resistant             | 6                            | Resistant             |
| LEV        | 30               | Intermediate          | 26                           | Intermediate          | 8                            | Resistant             |
| LZD        | 32               | Susceptible           | 32                           | Susceptible           | 34                           | Susceptible           |
| MLS-B      | -                | Sensitive MLS-B       | +                            | Inducible MLS-B       | -                            | Constitutive MLS-B    |
| MUP        | 42               | Susceptible           | 6                            | Resistant             | 45                           | Susceptible           |
| MY         | 32               | Susceptible           | 32                           | Susceptible           | 6                            | Resistant             |
| P          | 34               | Susceptible           | 8                            | Resistant             | 6                            | Resistant             |
| TGC        | 20               | Susceptible           | 25                           | Susceptible           | 30                           | Susceptible           |
| E-TEST     | MIC (mg/L)       | EUCAST Interpretation | MIC (mg/L)                   | EUCAST Interpretation | MIC (mg/L)                   | EUCAST Interpretation |
| CPT        | 0.19             | Susceptible           | 0.75                         | Susceptible           | 1.50                         | Intermediate          |
| DPC        | 0.38             | Susceptible           | 0.25                         | Susceptible           | 1.0                          | Susceptible           |
| LZ         | 1.5              | Susceptible           | 1.5                          | Susceptible           | 1.0                          | Susceptible           |
| TGC        | 0.094            | Susceptible           | 0.125                        | Susceptible           | 0.125                        | Susceptible           |
| TP         | 1.5              | Susceptible           | 1                            | Susceptible           | 8.0                          | Resistant             |
| VA         | 2.0              | Susceptible           | 1                            | Susceptible           | 4.0                          | Resistant             |

Legend: MRSA/VSSA – methicillin resistant *Staphylococcus aureus*/vancomycin sensitive *S. aureus*; MRSA/VISA - methicillin resistant *Staphylococcus aureus*/vancomycin intermediate *S. aureus*; Diffusion Discs: AK – Amikacin; CIP – Ciprofloxacin; CN – Gentamicin; DA – Clindamycin; E – Erythromycin; FOX – Cefoxitin; LEV – Levofloxacin; LZD – Linezolid; MLS-B – macrolide, lincosamide, streptogramine B;

MUP – Mupirocin; MY – Lincomycin; P – Penicillin; TGC – Tigecycline; E-tests: CPT – Ceftaroline; DPC – Daptomycin; LZ – Linezolid; TGC – Tigecycline; TP – Teicoplanin; VA – Vancomycin

**Table S4.** Diameter/MIC after the flight. Shifts indicating susceptibility changes relative to initial results (see Table S3).

|                |               |        |                |                    |                |        |                |
|----------------|---------------|--------|----------------|--------------------|----------------|--------|----------------|
| a)             |               |        |                |                    |                |        |                |
| <i>E. coli</i> |               |        |                |                    |                |        |                |
| Ground Control |               |        |                | Experimental Group | Flight Control |        |                |
| Antibiotic     | Diameter (mm) | Change | Susceptibility | No Growth          | Diameter (mm)  | Change | Susceptibility |
| CIP            | 29            | ↓      | ↓              |                    | 38             | ↑      | ↑              |
| IMP            | 16            | ↓      | ↓              |                    | 34             | ↑      | ↑              |
| PRL            | 21            | ↓      | ↓              |                    | 32             | ↑      | ↑              |
| CN             | 17            | ↓      | ↓              |                    | 24             | ↑      | ↑              |
| AMC            | 20            | ↓      | ↓              |                    | 23             | n/c    | n/c            |
| ETP            | 26            | ↓      | ↓              |                    | 28             | ↓      | ↓              |
| AK             | 17            | ↓      | ↓              |                    | 24             | ↑      | ↑              |
| MEM            | 25            | ↓      | ↓              |                    | 39             | ↑      | ↑              |
| CTX            | 27            | ↓      | ↓              |                    | 38             | ↑      | ↑              |
| LEV            | 28            | ↓      | ↓              |                    | 34             | ↑      | ↑              |
| TZP            | 22            | ↓      | ↓              |                    | 32             | ↑      | ↑              |
| CAZ            | 24            | ↓      | ↓              |                    | 40             | ↑      | ↑              |
| FEP            | 27            | ↓      | ↓              |                    | 38             | ↑      | ↑              |
| TGC            | 21            | ↓      | ↓              |                    | 30             | ↑      | ↑              |
| E-TEST         | MIC (mg/L)    | Change | Susceptibility | No Growth          | MIC (mg/L)     | Change | Susceptibility |
| TGC            | 0,125         | ↑      | ↓              |                    | 0,19           | ↑      | ↓              |

b)

| E. coli (CPE)  |               |        |                |                    |        |                |                |        |                |
|----------------|---------------|--------|----------------|--------------------|--------|----------------|----------------|--------|----------------|
| Ground Control |               |        |                | Experimental Group |        |                | Flight Control |        |                |
| Antibiotic     | Diameter (mm) | Change | Susceptibility | Diameter (mm)      | Change | Susceptibility | Diameter (mm)  | Change | Susceptibility |
| CIP            | 6             | n/c    | n/c            | 6                  | n/c    | n/c            | 6              | n/c    | n/c            |
| IMP            | 6             | ↓      | ↓              | 6                  | ↓      | ↓              | 6              | ↓      | ↓              |
| PRL            | 6             | n/c    | n/c            | 6                  | n/c    | n/c            | 6              | n/c    | n/c            |
| CN             | 17            | ↓      | ↓              | 20                 | ↓      | ↓              | 20             | ↑      | ↑              |
| AMC            | 6             | n/c    | n/c            | 6                  | n/c    | n/c            | 6              | n/c    | n/c            |
| ETP            | 6             | n/c    | n/c            | 6                  | n/c    | n/c            | 6              | n/c    | n/c            |
| AK             | 15            | ↓      | ↓              | 15                 | ↓      | ↓              | 16             | n/c    | n/c            |
| MEM            | 6             | n/c    | n/c            | 6                  | n/c    | n/c            | 6              | n/c    | n/c            |
| CTX            | 6             | n/c    | n/c            | 12                 | ↑      | ↑              | 8              | ↑      | ↑              |
| LEV            | 6             | n/c    | n/c            | 6                  | n/c    | n/c            | 6              | n/c    | n/c            |
| TZP            | 6             | n/c    | n/c            | 12                 | ↑      | ↑              | 6              | n/c    | n/c            |
| CAZ            | 6             | n/c    | n/c            | 14                 | ↑      | ↑              | 11             | ↑      | ↑              |
| FEP            | 6             | n/c    | n/c            | 10                 | ↑      | ↑              | 6              | n/c    | n/c            |
| TGC            | 18            | ↓      | ↓              | 24                 | n/c    | n/c            | 22             | ↓      | ↓              |
| E-TEST         | MIC (mg/L)    | Change | Susceptibility | MIC (mg/L)         | Change | Susceptibility | MIC (mg/L)     | Change | Susceptibility |
| TGC            | 0,38          | ↑      | ↓              | 0,25               | ↑      | ↓              | 0,38           | ↑      | ↓              |

c)

| <i>K. pneumoniae</i> |               |        |                |                     |        |                |                |        |                |
|----------------------|---------------|--------|----------------|---------------------|--------|----------------|----------------|--------|----------------|
| Ground Control       |               |        |                | Experimental Group* |        |                | Flight Control |        |                |
| Antibiotic           | Diameter (mm) | Change | Susceptibility | Diameter (mm)       | Change | Susceptibility | Diameter (mm)  | Change | Susceptibility |
| CIP                  | 20            | ↑      | ↑              | 42                  | ↑      | ↑              | 21             | ↓      | ↓              |
| IPM                  | 23            | ↓      | ↓              | 44                  | ↑      | ↑              | 28             | n/c    | n/c            |
| PRL                  | 6             | ↓      | ↓              | 22                  | ↑      | ↑              | 10             | n/c    | n/c            |
| CN                   | 12            | ↑      | ↑              | 22                  | ↑      | ↑              | 13             | ↑      | ↑              |
| AMC                  | 17            | n/c    | n/c            | 32                  | ↑      | ↑              | 17             | n/c    | n/c            |
| ETP                  | 25            | ↓      | ↓              | 34                  | ↑      | ↑              | 24             | ↓      | ↓              |
| AK                   | 20            | ↓      | ↓              | 38                  | ↑      | ↑              | 18             | ↓      | ↓              |
| MEM                  | 23            | ↓      | ↓              | 32                  | ↑      | ↑              | 29             | n/c    | n/c            |
| CTX                  | 17            | ↓      | ↓              | 38                  | ↑      | ↑              | 17             | ↓      | ↓              |
| LEV                  | 18            | ↓      | ↓              | 30                  | ↑      | ↑              | 19             | ↓      | ↓              |
| TZP                  | 19            | ↓      | ↓              | 24                  | ↑      | ↑              | 20             | ↓      | ↓              |
| CAZ                  | 12            | ↓      | ↓              | 18                  | ↑      | ↑              | 13             | ↓      | ↓              |
| FEP                  | 21            | ↓      | ↓              | 34                  | ↑      | ↑              | 22             | ↓      | ↓              |
| E-TEST               | MIC (mg/L)    | Change | Susceptibility |                     |        |                | MIC (mg/L)     | Change | Susceptibility |
| TGC                  | 4             | ↑      | ↓              | No Growth           |        |                | 6              | ↑      | ↓              |

d)

| <i>K. pneumoniae</i> (CPE) |               |        |                |                     |        |                |                |        |                |
|----------------------------|---------------|--------|----------------|---------------------|--------|----------------|----------------|--------|----------------|
| Ground Control             |               |        |                | Experimental Group* |        |                | Flight Control |        |                |
| Antibiotic                 | Diameter (mm) | Change | Susceptibility | Diameter (mm)       | Change | Susceptibility | Diameter (mm)  | Change | Susceptibility |
| CIP                        | 6             | n/c    | n/c            | 18                  | ↑      | ↑              | 6              | n/c    | n/c            |
| IPM                        | 6             | ↓      | ↓              | 28                  | ↑      | ↑              | 6              | ↓      | ↓              |
| PRL                        | 6             | n/c    | n/c            | - **                | -      | -              | 6              | n/c    | n/c            |
| CN                         | 17            | ↓      | ↓              | - **                | -      | -              | 17             | ↓      | ↓              |
| AMC                        | 6             | ↓      | ↓              | 30                  | ↑      | ↑              | 6              | ↓      | ↓              |
| ETP                        | 6             | ↓      | ↓              | - **                | -      | -              | 6              | ↓      | ↓              |
| AK                         | 11            | ↓      | ↓              | - **                | -      | -              | 12             | ↓      | ↓              |
| MEM                        | 6             | n/c    | n/c            | 26                  | ↑      | ↑              | 6              | n/c    | n/c            |
| CTX                        | 6             | n/c    | n/c            | 16                  | ↑      | ↑              | 6              | n/c    | n/c            |
| LEV                        | 8             | ↑      | ↑              | 42                  | ↑      | ↑              | 6              | n/c    | n/c            |
| TZP                        | 6             | n/c    | n/c            | 42                  | ↑      | ↑              | 6              | n/c    | n/c            |
| CAZ                        | 6             | n/c    | n/c            | 30                  | ↑      | ↑              | 6              | n/c    | n/c            |
| FEP                        | 6             | n/c    | n/c            | 24                  | ↑      | ↑              | 6              | n/c    | n/c            |
| E-TEST                     | MIC (mg/L)    | Change | Susceptibility |                     |        |                | MIC (mg/L)     | Change | Susceptibility |
| TGC                        | 1,5           | n/c    | n/c            | No Growth           |        |                | 1,5            | n/c    | n/c            |

e)

| <i>P. aeruginosa</i> |               |        |                |                    |                |        |                |
|----------------------|---------------|--------|----------------|--------------------|----------------|--------|----------------|
| Ground Control       |               |        |                | Experimental Group | Flight Control |        |                |
| Antibiotic           | Diameter (mm) | Change | Susceptibility | No Growth          | Diameter (mm)  | Change | Susceptibility |
| AK                   | 24            | ↑      | ↑              |                    | 28             | ↑      | ↑              |
| CIP                  | 35            | ↑      | ↑              |                    | 34             | ↑      | ↑              |
| LEV                  | 26            | ↑      | ↑              |                    | 30             | ↑      | ↑              |
| CAZ                  | 29            | ↑      | ↑              |                    | 24             | ↑      | ↑              |
| FEP                  | 32            | ↑      | ↑              |                    | 36             | ↑      | ↑              |
| IPM                  | 18            | ↓      | ↓              |                    | 32             | ↑      | ↑              |
| MEM                  | 17            | ↓      | ↓              |                    | 38             | ↑      | ↑              |
| TTC                  | 19            | ↓      | ↓              |                    | 30             | ↑      | ↑              |
| TZP                  | 32            | ↑      | ↑              |                    | 36             | ↑      | ↑              |
| PRL                  | 26            | ↓      | ↓              |                    | 36             | ↑      | ↑              |
| TIC                  | 26            | ↑      | ↑              |                    | 26             | ↑      | ↑              |

| f)                         |               |        |                |                    |                |        |                |
|----------------------------|---------------|--------|----------------|--------------------|----------------|--------|----------------|
| <i>P. aeruginosa</i> (MDR) |               |        |                |                    |                |        |                |
| Ground Control             |               |        |                | Experimental Group | Flight Control |        |                |
| Antibiotic                 | Diameter (mm) | Change | Susceptibility | No Growth          | Diameter (mm)  | Change | Susceptibility |
| AK                         | 6             | n/c    | n/c            |                    | 6              | n/c    | n/c            |
| CIP                        | 6             | n/c    | n/c            |                    | 6              | n/c    | n/c            |
| LEV                        | 6             | n/c    | n/c            |                    | 6              | n/c    | n/c            |
| CAZ                        | 10            | ↑      | ↑              |                    | 10             | ↑      | ↑              |
| FEP                        | 8             | ↑      | ↑              |                    | 9              | ↑      | ↑              |
| IPM                        | 6             | n/c    | n/c            |                    | 6              | n/c    | n/c            |
| MEM                        | 6             | n/c    | n/c            |                    | 6              | n/c    | n/c            |
| TTC                        | 6             | n/c    | n/c            |                    | 6              | n/c    | n/c            |
| TZP                        | 14            | ↑      | ↑              |                    | 16             | ↑      | ↑              |
| PRL                        | 14            | ↑      | ↑              |                    | 34             | ↑      | ↑              |
| TIC                        | 6             | n/c    | n/c            |                    | 6              | n/c    | n/c            |



g)

| <i>E. faecalis</i> |               |        |                |                    |        |                |                |        |                |
|--------------------|---------------|--------|----------------|--------------------|--------|----------------|----------------|--------|----------------|
| Ground Control     |               |        |                | Experimental Group |        |                | Flight Control |        |                |
| Antibiotic         | Diameter (mm) | Change | Susceptibility | Diameter (mm)      | Change | Susceptibility | Diameter (mm)  | Change | Susceptibility |
| CIP                | 21            | n/c    | n/c            | 28                 | ↑      | ↑              | 20             | ↓      | ↓              |
| IPM                | 28            | ↑      | ↑              | 34                 | ↑      | ↑              | 27             | n/c    | n/c            |
| AMP                | 22            | ↓      | ↓              | 32                 | ↑      | ↑              | 27             | ↑      | ↑              |
| GN                 | 20            | ↓      | ↓              | 24                 | ↑      | ↑              | 18             | ↓      | ↓              |
| S                  | 16            | ↓      | ↓              | 22                 | ↑      | ↑              | 16             | ↓      | ↓              |
| LEV                | 21            | ↑      | ↑              | 24                 | ↑      | ↑              | 19             | ↓      | ↓              |
| E-TEST             | MIC (mg/L)    | Change | Susceptibility | No Growth          |        |                | MIC (mg/L)     | Change | Susceptibility |
| TP                 | 0,19          | n/c    | n/c            |                    |        |                | 0,38           | ↑      | ↓              |
| VA                 | 4             | n/c    | n/c            |                    |        |                | 4              | n/c    | n/c            |
| TGC                | 0,125         | ↑      | ↓              |                    |        |                | 0,094          | n/c    | n/c            |
| LZ                 | 1,5           | n/c    | n/c            |                    |        |                | 3              | ↑      | ↓              |

h)

| <i>E. faecalis</i> (VRE) |               |        |                |                    |        |                |                |        |                |
|--------------------------|---------------|--------|----------------|--------------------|--------|----------------|----------------|--------|----------------|
| Ground Control           |               |        |                | Experimental Group |        |                | Flight Control |        |                |
| Antibiotic               | Diameter (mm) | Change | Susceptibility | Diameter (mm)      | Change | Susceptibility | Diameter (mm)  | Change | Susceptibility |
| CIP                      | 24            | n/c    | n/c            | 28                 | ↑      | ↑              | 23             | ↓      | ↓              |
| IPM                      | 28            | ↓      | ↓              | 30                 | n/c    | n/c            | 26             | ↓      | ↓              |
| AMP                      | 28            | ↓      | ↓              | 26                 | ↓      | ↓              | 28             | ↓      | ↓              |
| GN                       | 6             | n/c    | n/c            | 6                  | n/c    | n/c            | 6              | n/c    | n/c            |
| S                        | 17            | n/c    | n/c            | 26                 | ↑      | ↑              | 12             | ↓      | ↓              |
| LEV                      | 24            | ↑      | ↑              | 28                 | ↑      | ↑              | 22             | n/c    | n/c            |
| E-TEST                   | MIC (mg/L)    | Change | Susceptibility | No Growth          |        |                | MIC (mg/L)     | Change | Susceptibility |
| TP                       | 0,5           | ↓      | ↑              |                    |        |                | 0,75           | n/c    | n/c            |
| VA                       | 48            | n/c    | n/c            |                    |        |                | 48             | n/c    | n/c            |
| TGC                      | 0,094         | n/c    | n/c            |                    |        |                | 0,125          | ↑      | ↓              |
| LZ                       | 1,5           | n/c    | n/c            |                    |        |                | 2              | ↑      | ↓              |

i)

| S. aureus      |               |        |                |                    |                |        |                |
|----------------|---------------|--------|----------------|--------------------|----------------|--------|----------------|
| Ground Control |               |        |                | Experimental Group | Flight Control |        |                |
| Antibiotic     | Diameter (mm) | Change | Susceptibility |                    | Diameter (mm)  | Change | Susceptibility |
| FOX            | 32            | ↑      | ↑              | No Growth          | 32             | ↑      | ↑              |
| MUP            | 40            | ↓      | ↓              |                    | 40             | ↓      | ↓              |
| LZD            | 30            | ↓      | ↓              |                    | 32             | n/c    | n/c            |
| E              | 32            | ↑      | ↑              |                    | 32             | ↑      | ↑              |
| DA             | 30            | ↓      | ↓              |                    | 29             | ↓      | ↓              |
| MY             | 30            | ↓      | ↓              |                    | 30             | ↓      | ↓              |
| P              | 36            | ↑      | ↑              |                    | 38             | ↑      | ↑              |
| LEV            | 28            | ↓      | ↓              |                    | 32             | ↑      | ↑              |
| CIP            | 26            | ↓      | ↓              |                    | 28             | ↓      | ↓              |
| CN             | 22            | n/c    | n/c            |                    | 22             | n/c    | n/c            |
| AK             | 19            | ↓      | ↓              |                    | 20             | ↓      | ↓              |
| TGC            | 27            | ↓      | ↓              |                    | 28             | ↓      | ↓              |
| E-TEST         | MIC (mg/L)    | Change | Susceptibility |                    | MIC (mg/L)     | Change | Susceptibility |
| VA             | 3,0           | ↑      | ↓              | No Growth          | 2,0            | n/c    | n/c            |
| TP             | 1,5           | n/c    | n/c            |                    | 1,5            | n/c    | n/c            |
| CPT            | 0,047         | ↓      | ↑              |                    | 0,047          | ↓      | ↑              |
| TGC            | 0,064         | ↓      | ↑              |                    | 0,094          | n/c    | n/c            |
| LZ             | 1,5           | n/c    | n/c            |                    | 1,0            | ↓      | ↑              |
| DPC            | 0,038         | ↓      | ↑              |                    | 0,25           | ↓      | ↑              |

j)

| <i>S. aureus</i> (MRSA/VSSA) |               |        |                |                    |        |                |                |        |                |
|------------------------------|---------------|--------|----------------|--------------------|--------|----------------|----------------|--------|----------------|
| Ground Control               |               |        |                | Experimental Group |        |                | Flight Control |        |                |
| Antibiotic                   | Diameter (mm) | Change | Susceptibility | Diameter (mm)      | Change | Susceptibility | Diameter (mm)  | Change | Susceptibility |
| FOX                          | 8             | ↓      | ↓              | - **               | -      | -              | 8              | ↓      | ↓              |
| MUP                          | 6             | n/c    | n/c            | - **               | -      | -              | 6              | n/c    | n/c            |
| LZD                          | 26            | ↓      | ↓              | 44                 | ↑      | ↑              | 27             | ↓      | ↓              |
| E                            | 6             | n/c    | n/c            | - **               | -      | -              | 6              | n/c    | n/c            |
| DA                           | 6             | ↓      | ↓              | - **               | -      | -              | 6              | ↓      | ↓              |
| MY                           | 6             | ↓      | ↓              | - **               | -      | -              | 6              | ↓      | ↓              |
| P                            | 8             | n/c    | n/c            | 20                 | ↑      | ↑              | 6              | ↓      | ↓              |
| LEV                          | 20            | ↓      | ↓              | - **               | -      | -              | 28             | ↑      | ↑              |
| CIP                          | 21            | ↓      | ↓              | 35                 | ↑      | ↑              | 24             | n/c    | n/c            |
| GN                           | 22            | ↓      | ↓              | 30                 | ↑      | ↑              | 23             | ↓      | ↓              |
| AK                           | 14            | n/c    | n/c            | 16                 | ↑      | ↑              | 13             | ↓      | ↓              |
| TGC                          | 22            | ↓      | ↓              | 32                 | ↑      | ↑              | 24             | ↓      | ↓              |
| E-TEST                       | MIC (mg/L)    | Change | Susceptibility | MIC (mg/L)         | Change | Susceptibility | MIC (mg/L)     | Change | Susceptibility |
| VA                           | 2,0           | ↑      | ↓              | 1,5                | ↑      | ↓              | 1,5            | ↑      | ↓              |
| TP                           | 1,0           | n/c    | n/c            | 0,25               | ↓      | ↑              | 1,5            | ↑      | ↓              |
| CPT                          | 0,75          | n/c    | n/c            | 0,25               | ↓      | ↑              | 0,75           | n/c    | n/c            |
| TGC                          | 0,125         | n/c    | n/c            | 0,094              | ↓      | ↑              | 0,19           | ↑      | ↓              |
| LZ                           | 1,5           | n/c    | n/c            | 0,064              | ↓      | ↑              | 1,5            | n/c    | n/c            |
| DPC                          | 0,38          | ↑      | ↓              | 0,125              | ↓      | ↑              | 0,25           | n/c    | n/c            |

k)

| S. aureus (MRSA/VISA) |               |        |                |                    |                |        |                |
|-----------------------|---------------|--------|----------------|--------------------|----------------|--------|----------------|
| Ground Control        |               |        |                | Experimental Group | Flight Control |        |                |
| Antibiotic            | Diameter (mm) | Change | Susceptibility | No Growth          | Diameter (mm)  | Change | Susceptibility |
| FOX                   | 6             | n/c    | n/c            |                    | 6              | n/c    | n/c            |
| MUP                   | 42            | ↓      | ↓              |                    | 42             | ↓      | ↓              |
| LZD                   | 36            | ↑      | ↑              |                    | 34             | n/c    | n/c            |
| E                     | 6             | n/c    | n/c            |                    | 6              | n/c    | n/c            |
| DA                    | 6             | n/c    | n/c            |                    | 6              | n/c    | n/c            |
| MY                    | 6             | n/c    | n/c            |                    | 6              | n/c    | n/c            |
| P                     | 6             | n/c    | n/c            |                    | 6              | n/c    | n/c            |
| LEV                   | 11            | ↑      | ↑              |                    | 9              | ↓      | ↓              |
| CIP                   | 6             | n/c    | n/c            |                    | 6              | n/c    | n/c            |
| GN                    | 6             | n/c    | n/c            |                    | 6              | n/c    | n/c            |
| AK                    | 13            | ↓      | ↓              |                    | 11             | ↓      | ↓              |
| TGC                   | 28            | ↓      | ↓              |                    | 27             | ↓      | ↓              |
| E-TEST                | MIC (mg/L)    | Change | Susceptibility | No Growth          | MIC (mg/L)     | Change | Susceptibility |
| VA                    | 6,0           | ↑      | ↓              |                    | 4,0            | n/c    | n/c            |
| TP                    | 12,0          | ↑      | ↓              |                    | 12,0           | ↑      | ↓              |
| CPT                   | 2,0           | ↑      | ↓              |                    | 2,0            | ↑      | ↓              |
| TGC                   | 0,125         | n/c    | n/c            |                    | 0,25           | ↑      | ↓              |
| LZ                    | 1,0           | n/c    | n/c            |                    | 1,0            | n/c    | n/c            |
| DPC                   | 1,0           | n/c    | n/c            |                    | 1,0            | n/c    | n/c            |

Legend: Abbreviations and special indications for the tables:  
AK – Amikacin; AMC - Amoxicillin/clavulanic acid; CAZ – Ceftazidime; CIP – Ciprofloxacin; CN – Gentamicin; CTX – Cefotaxime; ETP – Ertapenem; FEP – Cefepime; IMP – Imipenem; LEV – Levofloxacin; MEM – Meropenem; PRL – Piperacillin; TGC – Tigecycline; TZP - Piperacillin/Tazobactam; TGC – Tigecycline; TIC – Ticarcillin; TTC – Ticarcillin/clavulanic acid; AMP – Ampicillin; S – Streptomycin; LZ – Linezolid; TP – Teicoplanin; VA – Vancomycin; DA – Clindamycin; E – Erythromycin; FOX – Cefoxitin; LZD – Linezolid; MLS-B – macrolide, lincosamide, streptogramine B; MUP – Mupirocin; MY – Lincomycin; P – Penicillin; CPT – Ceftaroline; DPC – Daptomycin; n/c – not changed;  
\*- Due to small growth rate radiuses from the nearest colony were calculated  
\*\*- Reading impossible due to technical issues

**Table S5.** Changes in clinical interpretation after the stratospheric balloon flight (according to EUCAST recommendations).

| Bacterial Strain     | Antibiotic<br>(Diffusion Disc) | Before Flight |                | After Flight  |                      |                                    |
|----------------------|--------------------------------|---------------|----------------|---------------|----------------------|------------------------------------|
|                      |                                | Diameter (mm) | Interpretation | Diameter (mm) | Interpretation       | Group                              |
| <i>E. coli</i>       | Imipenem                       | 30            | Sensitive      | 16            | Resistant            | Ground Control                     |
|                      | Amikacin                       | 22            | Sensitive      | 17            | Resistant            | Ground Control                     |
| <i>K. pneumoniae</i> | Ciprofloxacin                  | 25            | Sensitive      | 20; 21        | Resistant            | Ground Control; Flight Control     |
|                      | Piperacillin                   | 10*           | Resistant      | 22            | Sensitive            | Experimental Group                 |
|                      | Gentamicin                     | 8*            | Resistant      | 22            | Sensitive            | Experimental Group                 |
|                      | Amikacin                       | 17            | Resistant      | 32            | Sensitive            | Experimental Group                 |
|                      | Ertapenem                      | 29            | Sensitive      | 24            | Resistant            | Flight Control                     |
|                      | Cefotaxime                     | 20            | Sensitive      | 17; 17        | Intermediate         | Ground Control; Experimental Group |
|                      | Levofloxacin                   | 21            | Intermediate   | 18; 30        | Resistant; Sensitive | Ground Control; Experimental Group |
|                      | Piperacillin/Tazobactam        | 22            | Sensitive      | 19            | Intermediate         | Ground Control                     |
|                      | Cefepime                       | 25            | Intermediate   | 21; 34        | Resistant; Sensitive | Ground Control; Experimental Group |
|                      | Imipenem                       | 10*           | Resistant      | 28            | Sensitive            | Experimental Group                 |

|                                     |                         |      |              |     |              |                    |
|-------------------------------------|-------------------------|------|--------------|-----|--------------|--------------------|
| <i>K. pneumoniae</i><br>(resistant) | Amikacin                | 7    | Resistant    | 30  | Sensitive    | Experimental Group |
|                                     | Meropenem               | 11** | Resistant    | 26  | Sensitive    | Experimental Group |
|                                     | Levofloxacin            | 8**  | Resistant    | 42  | Sensitive    | Experimental Group |
|                                     | Piperacillin/Tazobactam | 7**  | Resistant    | 42  | Sensitive    | Experimental Group |
|                                     | Ceftazidime             | 6    | Resistant    | 30  | Sensitive    | Experimental Group |
|                                     | Cefepime                | 6    | Resistant    | 24  | Intermediate | Experimental Group |
| <i>P. aeruginosa</i>                | Imipenem                | 22   | Intermediate | 18* | Resistant    | Ground Control     |
|                                     | Meropenem               | 27   | Sensitive    | 17  | Resistant    | Ground Control     |
| <i>P. aeruginosa</i><br>(resistant) | Piperacillin            | 10** | Resistant    | 34  | Intermediate | Flight Control     |
| <i>E. faecalis</i><br>(resistant)   | Streptomycin            | 17   | S            | 12  | Resistant    | Flight Control     |

| Bacterial Strain                | Antibiotic (E-TEST) | Before Flight            |                | After Flight             |                |                             |
|---------------------------------|---------------------|--------------------------|----------------|--------------------------|----------------|-----------------------------|
|                                 |                     | MIC Breakpoint<br>(mg/L) | Interpretation | MIC Breakpoint<br>(mg/L) | Interpretation | Group                       |
| <i>S. aureus</i>                | Vancomycin          | 2.0                      | Sensitive      | 3.0                      | Resistant      | Ground Control              |
| <i>S. aureus</i><br>(MRSA/VISA) | Ceftaroline         | 1.5                      | Intermediate   | 2.0; 2.0                 | Resistant      | Control Group; Flight Group |

Legend: \* Radius measured from the closest colony; \*\* Diameter of the halo around diffusion disc. Colonies within that halo were observed
